# Supplementary material
Source: ML conference proceedings conference paper supplement (https://proceedings.neurips.cc/paper_files/paper/2007/hash/ca3ec598002d2e7662e2ef4bdd58278b-Abstract.html)
Supplement: Supplementary file [file ca3ec598002d2e7662e2ef4bdd58278b-Supplemental.zip]

---

# A Game-Theoretic Approach to Apprenticeship Learning — Supplement

---

**Umar Syed**  
 Computer Science Department  
 Princeton University  
 35 Olden St  
 Princeton, NJ 08540-5233  
 usyed@cs.princeton.edu

**Robert E. Schapire**  
 Computer Science Department  
 Princeton University  
 35 Olden St  
 Princeton, NJ 08540-5233  
 schapire@cs.princeton.edu

## 1 The MWAL Algorithm

For reference, the MWAL algorithm from the main paper is repeated below.

---

### Algorithm 1 The MWAL algorithm

---

- 1: **Given:** An MDP  $M$  and an estimate of the expert's feature expectations  $\hat{\mu}_E$ .
  - 2: Let  $\beta = \left(1 + \sqrt{\frac{2 \ln k}{T}}\right)^{-1}$ .
  - 3: Define  $\tilde{\mathbf{G}}(i, \mu) \triangleq ((1 - \gamma)(\mu(i) - \hat{\mu}_E(i)) + 2)/4$ , where  $\mu \in \mathbb{R}^k$ .
  - 4: Initialize  $W^{(1)}(i) = 1$  for  $i = 1, \dots, k$ .
  - 5: **for**  $t = 1, \dots, T$  **do**
  - 6:   Set  $w^{(t)}(i) = \frac{W^{(t)}(i)}{\sum_i W^{(t)}(i)}$  for  $i = 1, \dots, k$ .
  - 7:   Compute an  $\epsilon_P$ -optimal policy  $\hat{\pi}^{(t)}$  for  $M$  with respect to reward function  $R(s) = \mathbf{w}^{(t)} \cdot \boldsymbol{\phi}(s)$ .
  - 8:   Compute an  $\epsilon_F$ -good estimate  $\hat{\mu}^{(t)}$  of  $\mu^{(t)} = \mu(\hat{\pi}^{(t)})$ .
  - 9:    $W^{(t+1)}(i) = W^{(t)}(i) \cdot \exp(\ln(\beta) \cdot \tilde{\mathbf{G}}(i, \hat{\mu}^{(t)}))$  for  $i = 1, \dots, k$ .
  - 10: **end for**
  - 11: Post-processing: Return the mixed policy  $\bar{\psi}$  that assigns probability  $\frac{1}{T}$  to  $\hat{\pi}^{(t)}$ , for all  $t \in \{1, \dots, T\}$ .
- 

### 1.1 Differences between $\mathbf{G}$ and $\tilde{\mathbf{G}}$

In the main paper, Algorithm 1 was motivated by appealing to the game matrix

$$\mathbf{G}(i, j) = \mu^j(i) - \mu_E(i),$$

where  $\mu^j$  are the feature expectations of the  $j$ th deterministic policy. However, the algorithm actually uses

$$\tilde{\mathbf{G}}(i, \mu) = ((1 - \gamma)(\mu(i) - \hat{\mu}_E(i)) + 2)/4$$

The rationale behind each of the differences between  $\mathbf{G}$  and  $\tilde{\mathbf{G}}$  follows.

- $\tilde{\mathbf{G}}$  depends on  $\hat{\mu}_E$  instead of  $\mu_E$  because  $\mu_E$  is unknown and must be estimated. We account for the error of this estimate in the proof of Theorem 2.
- $\tilde{\mathbf{G}}$  is defined in terms of arbitrary feature expectations  $\mu$  instead of  $\mu^j$  because lines 7 and 8 of Algorithm 1 produce approximations, and hence  $\hat{\mu}^{(t)}$  may not be the feature expectations of any deterministic policy. The results of Freund and Schapire [2] that we rely on are not affected by this change.

- $\tilde{\mathbf{G}}$  is shifted and scaled so that  $\tilde{\mathbf{G}}(i, \boldsymbol{\mu}) \in [0, 1]$ . This is necessary in order to directly apply the main result of Freund and Schapire [2].

The last point relies on a simplifying assumption. Recall that if  $\boldsymbol{\mu}$  is a vector of feature expectations for some policy, then  $\boldsymbol{\mu} \in [0, \frac{1}{1-\gamma}]^k$ , because  $\boldsymbol{\phi}(s) \in [0, 1]^k$  for all  $s$ . For simplicity, we will assume that this holds even if  $\boldsymbol{\mu}$  is an *estimate* of a vector of feature expectations. (This is without loss of generality: if it does not hold, we can trim  $\boldsymbol{\mu}$  so that it falls within the desired range without increasing the error in the estimate.) Therefore  $(\boldsymbol{\mu} - \hat{\boldsymbol{\mu}}_E) \in [\frac{-2}{1-\gamma}, \frac{2}{1-\gamma}]^k$ , and hence  $\tilde{\mathbf{G}}(i, \boldsymbol{\mu}) \in [0, 1]$ .

## 2 Proof of Theorem 2

In this section we prove Theorem 2 from the main paper.

**Theorem 2.** *Given an MDP  $M$ , and  $m$  independent trajectories from an expert's policy  $\pi_E$ . Suppose we execute the MWAL algorithm for  $T$  iterations. Let  $\bar{\boldsymbol{\psi}}$  be the mixed policy returned by the algorithm. Let  $\epsilon_F$  and  $\epsilon_P$  be the approximation errors from lines 7 and 8 of the algorithm. Let  $H \geq (1/(1-\gamma)) \ln(1/(\epsilon_H(1-\gamma)))$  be the length of each sample trajectory. Let  $\epsilon_R = \min_{\mathbf{w} \in \mathbb{S}^k} \max_s |R^*(s) - \mathbf{w} \cdot \boldsymbol{\phi}(s)|$  be the representation error of the features. Let  $v^* = \max_{\boldsymbol{\psi} \in \Psi} \min_{\mathbf{w} \in \mathbb{S}^k} [\mathbf{w} \cdot \boldsymbol{\mu}(\boldsymbol{\psi}) - \mathbf{w} \cdot \boldsymbol{\mu}_E]$  be the game value. Then in order for*

$$V(\bar{\boldsymbol{\psi}}) \geq V(\pi_E) + v^* - \epsilon \quad (1)$$

to hold with probability at least  $1 - \delta$ , it suffices that

$$T \geq \frac{9 \ln k}{2(\epsilon'(1-\gamma))^2} \quad (2)$$

$$m \geq \frac{2}{(\epsilon'(1-\gamma))^2} \ln \frac{2k}{\delta} \quad (3)$$

$$(4)$$

where

$$\epsilon' \leq \frac{\epsilon - (2\epsilon_F + \epsilon_P + 2\epsilon_H + 2\epsilon_R/(1-\gamma))}{3}. \quad (5)$$

To prove Theorem 2, we will first need to prove several auxiliary results. Define

$$\tilde{\mathbf{G}}(\mathbf{w}, \boldsymbol{\mu}) \triangleq \sum_{i=1}^k \mathbf{w}(i) \cdot \tilde{\mathbf{G}}(i, \boldsymbol{\mu}).$$

Now we can directly apply the main result from Freund and Schapire [2], which we will call the MW Theorem.

**MW Theorem.** *At the end of the MWAL algorithm*

$$\frac{1}{T} \sum_{t=1}^T \tilde{\mathbf{G}}(\mathbf{w}^{(t)}, \hat{\boldsymbol{\mu}}^{(t)}) \leq \frac{1}{T} \min_{\mathbf{w} \in \mathbb{S}^k} \sum_{t=1}^T \tilde{\mathbf{G}}(\mathbf{w}, \hat{\boldsymbol{\mu}}^{(t)}) + \Delta_T$$

where

$$\Delta_T = \sqrt{\frac{2 \ln k}{T}} + \frac{\ln k}{T}.$$

*Proof.* Freund and Schapire [2]. □

The following corollary follows straightforwardly from the MW Theorem.

**Corollary 1.** *At the end of the MWAL algorithm*

$$\frac{1}{T} \sum_{t=1}^T [\mathbf{w}^{(t)} \cdot \hat{\boldsymbol{\mu}}^{(t)} - \mathbf{w}^{(t)} \cdot \hat{\boldsymbol{\mu}}_E] \leq \frac{1}{T} \min_{\mathbf{w} \in \mathbb{S}^k} \sum_{t=1}^T [\mathbf{w} \cdot \hat{\boldsymbol{\mu}}^{(t)} - \mathbf{w} \cdot \hat{\boldsymbol{\mu}}_E] + \Delta_T$$

The next lemma bounds the number of samples needed to make  $\hat{\mu}_E$  close to  $\mu_E$ .

**Lemma 1.** *Suppose the trajectory length  $H \geq (1/(1-\gamma)) \ln(1/(\epsilon_H(1-\gamma)))$ . For  $\|\hat{\mu}_E - \mu_E\|_\infty \leq \epsilon + \epsilon_H$  to hold with probability at least  $1 - \delta$ , it suffices that*

$$m \geq \frac{2}{(\epsilon(1-\gamma))^2} \ln\left(\frac{2k}{\delta}\right)$$

*Proof.* This is a standard proof using Hoeffding's inequality, similar to that found in Abbeel and Ng [1]. However, care must be taken in one respect:  $\hat{\mu}_E$  is *not* an unbiased estimate of  $\mu_E$ , because the trajectories are truncated at  $H$ . So define

$$\mu_E^H \triangleq E \left[ \sum_{t=0}^H \gamma^t \phi(s_t) \mid \pi_E, \theta, D \right].$$

Then we have,

$$\begin{aligned} \forall i \in [1, \dots, k] \quad & \Pr(|\hat{\mu}_E(i) - \mu_E^H(i)| \geq \epsilon) \leq 2 \exp(-m(\epsilon(1-\gamma))^2/2) \\ \Rightarrow \quad & \Pr(\exists i \in [1, \dots, k] \text{ s.t. } |\hat{\mu}_E(i) - \mu_E^H(i)| \geq \epsilon) \leq 2k \exp(-m(\epsilon(1-\gamma))^2/2) \\ \Rightarrow \quad & \Pr(\forall i \in [1, \dots, k], |\hat{\mu}_E(i) - \mu_E^H(i)| \leq \epsilon) \geq 1 - 2k \exp(-m(\epsilon(1-\gamma))^2/2) \\ \Rightarrow \quad & \Pr(\|\hat{\mu}_E - \mu_E^H\|_\infty \leq \epsilon) \geq 1 - 2k \exp(-m(\epsilon(1-\gamma))^2/2) \end{aligned}$$

We used in order: Hoeffding's inequality and  $\mu_E^H \in [0, \frac{1}{1-\gamma}]^k$ ; the union bound; the probability of disjoint events; the definition of  $L_\infty$  norm.

It is not hard to show that  $\|\mu_E^H - \mu_E\|_\infty \leq \epsilon_H$  (see Kearns and Singh [4], Lemma 2). Hence if  $m \geq \frac{2}{(\epsilon(1-\gamma))^2} \ln(\frac{2k}{\delta})$ , then with probability at least  $1 - \delta$  we have

$$\|\hat{\mu}_E - \mu_E\|_\infty \leq \|\hat{\mu}_E - \mu_E^H\|_\infty + \|\mu_E^H - \mu_E\|_\infty \leq \epsilon + \epsilon_H.$$

□

The next lemma bounds the impact of “representation error”: it says that if  $R^*(s)$  and  $\mathbf{w}^* \cdot \phi(s)$  are not very different, then neither are  $V(\psi)$  and  $\mathbf{w}^* \cdot \mu(\psi)$ .

**Lemma 2.** *If  $\max_s |R^*(s) - \mathbf{w}^* \cdot \phi(s)| \leq \epsilon_R$ , then  $|V(\psi) - \mathbf{w}^* \cdot \mu(\psi)| \leq \frac{\epsilon_R}{1-\gamma}$  for every MDP/R  $M$  and mixed policy  $\psi$ .*

*Proof.*

$$\begin{aligned} & |V(\psi) - \mathbf{w}^* \cdot \mu(\psi)| \\ = & \left| E \left[ \sum_{t=0}^{\infty} \gamma^t R^*(s_t) \right] - E \left[ \sum_{t=0}^{\infty} \gamma^t \mathbf{w}^* \cdot \phi(s_t) \right] \right| \\ = & \left| \lim_{H \rightarrow \infty} E \left[ \sum_{t=0}^H \gamma^t R^*(s_t) \right] - \lim_{H \rightarrow \infty} E \left[ \sum_{t=0}^H \gamma^t \mathbf{w}^* \cdot \phi(s_t) \right] \right| \\ = & \left| \lim_{H \rightarrow \infty} E \left[ \sum_{t=0}^H \gamma^t (R^*(s_t) - \mathbf{w}^* \cdot \phi(s_t)) \right] \right| \\ \leq & \lim_{H \rightarrow \infty} E \left[ \sum_{t=0}^H \gamma^t |R^*(s_t) - \mathbf{w}^* \cdot \phi(s_t)| \right] \\ \leq & \frac{\epsilon_R}{1-\gamma} \end{aligned}$$

□

We are now ready to prove Theorem 2. The proof closely follows Section 2.5 of Freund and Schapire [2].

*Proof of Theorem 2.* Let  $\bar{\mathbf{w}} = \frac{1}{T} \sum_{t=1}^T \mathbf{w}^{(t)}$ . Then we have

$$\begin{aligned} v^* &= \max_{\psi \in \Psi} \min_{\mathbf{w} \in \mathbb{S}^k} [\mathbf{w} \cdot \boldsymbol{\mu}(\psi) - \mathbf{w} \cdot \boldsymbol{\mu}_E] \\ &= \min_{\mathbf{w} \in \mathbb{S}^k} \max_{\psi \in \Psi} [\mathbf{w} \cdot \boldsymbol{\mu}(\psi) - \mathbf{w} \cdot \boldsymbol{\mu}_E] \end{aligned} \quad (6)$$

$$\begin{aligned} &\leq \min_{\mathbf{w} \in \mathbb{S}^k} \max_{\psi \in \Psi} [\mathbf{w} \cdot \boldsymbol{\mu}(\psi) - \mathbf{w} \cdot \hat{\boldsymbol{\mu}}_E] + \epsilon' + \epsilon_H \\ &\leq \max_{\psi \in \Psi} [\bar{\mathbf{w}} \cdot \boldsymbol{\mu}(\psi) - \bar{\mathbf{w}} \cdot \hat{\boldsymbol{\mu}}_E] + \epsilon' + \epsilon_H \end{aligned} \quad (7)$$

$$= \max_{\psi \in \Psi} \frac{1}{T} \sum_{t=1}^T [\mathbf{w}^{(t)} \cdot \boldsymbol{\mu}(\psi) - \mathbf{w}^{(t)} \cdot \hat{\boldsymbol{\mu}}_E] + \epsilon' + \epsilon_H \quad (8)$$

$$\leq \frac{1}{T} \sum_{t=1}^T \max_{\psi \in \Psi} [\mathbf{w}^{(t)} \cdot \boldsymbol{\mu}(\psi) - \mathbf{w}^{(t)} \cdot \hat{\boldsymbol{\mu}}_E] + \epsilon' + \epsilon_H$$

$$\leq \frac{1}{T} \sum_{t=1}^T [\mathbf{w}^{(t)} \cdot \boldsymbol{\mu}(\hat{\pi}^{(t)}) - \mathbf{w}^{(t)} \cdot \hat{\boldsymbol{\mu}}_E] + \epsilon_P + \epsilon' + \epsilon_H \quad (9)$$

$$\leq \frac{1}{T} \sum_{t=1}^T [\mathbf{w}^{(t)} \cdot \hat{\boldsymbol{\mu}}^{(t)} - \mathbf{w}^{(t)} \cdot \hat{\boldsymbol{\mu}}_E] + \epsilon_F + \epsilon_P + \epsilon' + \epsilon_H \quad (10)$$

$$\leq \frac{1}{T} \min_{\mathbf{w} \in \mathbb{S}^k} \sum_{t=1}^T [\mathbf{w} \cdot \hat{\boldsymbol{\mu}}^{(t)} - \mathbf{w} \cdot \hat{\boldsymbol{\mu}}_E] + \Delta_T + \epsilon_F + \epsilon_P + \epsilon' + \epsilon_H \quad (11)$$

$$\leq \frac{1}{T} \min_{\mathbf{w} \in \mathbb{S}^k} \sum_{t=1}^T [\mathbf{w} \cdot \boldsymbol{\mu}(\hat{\pi}^{(t)}) - \mathbf{w} \cdot \hat{\boldsymbol{\mu}}_E] + \Delta_T + 2\epsilon_F + \epsilon_P + \epsilon' + \epsilon_H \quad (12)$$

$$= \min_{\mathbf{w} \in \mathbb{S}^k} [\mathbf{w} \cdot \boldsymbol{\mu}(\bar{\psi}) - \mathbf{w} \cdot \hat{\boldsymbol{\mu}}_E] + \Delta_T + 2\epsilon_F + \epsilon_P + \epsilon' + \epsilon_H \quad (13)$$

$$\leq \min_{\mathbf{w} \in \mathbb{S}^k} [\mathbf{w} \cdot \boldsymbol{\mu}(\bar{\psi}) - \mathbf{w} \cdot \boldsymbol{\mu}_E] + \Delta_T + 2\epsilon_F + \epsilon_P + 2\epsilon' + 2\epsilon_H \quad (14)$$

$$\leq \mathbf{w}^* \cdot \boldsymbol{\mu}(\bar{\psi}) - \mathbf{w}^* \cdot \boldsymbol{\mu}_E + \Delta_T + 2\epsilon_F + \epsilon_P + 2\epsilon' + 2\epsilon_H \quad (15)$$

$$\leq V(\bar{\psi}) - V(\pi_E) + \Delta_T + 2\epsilon_F + \epsilon_P + 2\epsilon' + 2\epsilon_H + (2\epsilon_R)/(1 - \gamma) \quad (16)$$

In (6), we used von Neumann's minmax theorem. In (7), Lemma 1. In (8), the definition of  $\bar{\mathbf{w}}$ . In (9), the fact that  $\hat{\pi}^t$  is  $\epsilon_P$ -optimal w.r.t.  $R(s) = \mathbf{w}^t \cdot \phi(s)$ . In (10), the fact that  $\hat{\boldsymbol{\mu}}^{(t)}$  is an  $\epsilon_F$ -good estimate of  $\boldsymbol{\mu}(\hat{\pi}^{(t)})$ . In (11), Corollary 1. In (12), again the fact that  $\hat{\boldsymbol{\mu}}^{(t)}$  is an  $\epsilon_F$ -good estimate of  $\boldsymbol{\mu}(\hat{\pi}^{(t)})$ . In (13), the definition of  $\bar{\psi}$ . In (14), Lemma 1. In (15), we let  $\mathbf{w}^* = \arg \min_{\mathbf{w} \in \mathbb{S}^k} \max_s |R^*(s) - (\mathbf{w} \cdot \phi(s))|$ . In (16), Lemma 2.

Plugging in the choice for  $T$  into  $\Delta_T$  and rearranging implies the theorem.  $\square$

### 3 When transition function is unknown

We will employ several technical lemmas developed in Kearns and Singh [4] and Abbeel and Ng [5]. This is not a complete proof, but just a sketch of the main components of one.

For an MDP/R  $M = (\mathcal{S}, \mathcal{A}, \gamma, \theta, \phi)$ , suppose that we know  $\theta(s, a, \cdot)$  exactly on a subset  $Z \subseteq \mathcal{S} \times \mathcal{A}$ . Then we can construct a estimate  $M_Z$  of  $M$  according to the following definition, which is similar to Definition 9 in Kearns and Singh [4].

**Definition 1.** Let  $M = (\mathcal{S}, \mathcal{A}, \gamma, \theta, \phi)$  be a MDP/R, and let  $Z \subseteq \mathcal{S} \times \mathcal{A}$ . Then the induced MDP/R  $M_Z = (\mathcal{S} \cup \{s_0\}, \mathcal{A}, \gamma, \theta_Z, \phi_Z)$  is defined as follows, where  $\mathcal{S}_Z = \{s : (s, a) \in Z \text{ for some } a \in \mathcal{A}\}$ :

- $\theta_Z(s_0, a, s_0) = 1$  for all  $a \in \mathcal{A}$ , i.e.  $s_0$  is an absorbing state.
- If  $(s, a) \in Z$  and  $s' \in \mathcal{S}_Z$ , then  $\theta_Z(s, a, s') = \theta(s, a, s')$ .

- If  $(s, a) \in Z$ , then  $\theta_Z(s, a, s_0) = 1 - \sum_{s' \in \mathcal{S}_Z} \theta(s, a, s')$ .
- If  $(s, a) \notin Z$ , then  $\theta_Z(s, a, s_0) = 1$ .
- $\phi_Z(s) = \phi(s)$  for all  $s \in \mathcal{S}$ , and  $\phi_Z(s_0) = -\mathbf{1}$ , where  $-\mathbf{1}$  is the  $k$ -length vector of all  $-1$ 's.

The following lemma, due to Kearns and Singh [4] (Lemma 7), shows that  $M_Z$  is essentially a pessimistic estimate for  $M$ .

**Lemma 3.** Let  $M = (\mathcal{S}, \mathcal{A}, \gamma, \theta, \phi)$  be a MDP/R where  $\phi(s) \in [-1, 1]^k$ , and let  $Z \subseteq \mathcal{S} \times \mathcal{A}$ . Then for all  $\mathbf{w} \in \mathbb{S}^k$  and  $\psi \in \Psi$ , we have  $\mathbf{w} \cdot \mu(\psi, M) \geq \mathbf{w} \cdot \mu(\psi, M_Z)$ .

*Proof.* As above, let  $\mathcal{S}_Z = \{s : (s, a) \in Z \text{ for some } a \in \mathcal{A}\}$ . Also let  $\mathcal{A}_Z = \{a : (s, a) \in Z \text{ for some } s \in \mathcal{S}\}$ . All transitions in  $M_Z$  between states in  $\mathcal{S}_Z$  using an action in  $\mathcal{A}_Z$  are the same as in  $M$ , while all other transitions are routed to the absorbing state  $s_0$ . Observing that  $\phi(s_0) = -\mathbf{1}$  and  $\phi(s) \succeq -\mathbf{1}$  for all  $s$  proves the lemma.  $\square$

**Definition 2.** Let  $M = (\mathcal{S}, \mathcal{A}, \gamma, \theta, \phi)$  be an MDP/R. Let  $H$  be the length of each sample trajectory from the expert's policy. Then we say a subset  $Z \subseteq \mathcal{S} \times \mathcal{A}$  is  $(\eta, H)$ -visited by  $\pi_E$  in  $M$  if

$$Z = \left\{ (s, a) \mid \Pr(\exists t \in [1, \dots, H] \text{ such that } (s_t, a_t) = (s, a) \mid \pi_E, M) \geq \frac{\eta}{|\mathcal{S}||\mathcal{A}|} \right\}. \quad (17)$$

The following lemma, due to Abbeel and Ng [5], says that if  $Z \subseteq \mathcal{S} \times \mathcal{A}$  is  $(\eta, H)$ -visited by  $\pi_E$  in  $M$ , then  $\pi_E$  has a similar value in  $M_Z$  as it does in  $M$ .

**Lemma 4.** Let  $M = (\mathcal{S}, \mathcal{A}, \gamma, \theta, \phi)$  be a MDP/R, let  $H \geq (1/(1-\gamma)) \ln(1/(\epsilon_H(1-\gamma)))$ , and let  $Z \subseteq \mathcal{S} \times \mathcal{A}$  be  $(\eta, H)$ -visited by  $\pi_E$  in  $M$ . Then for all  $\mathbf{w} \in \mathbb{S}^k$

$$|\mathbf{w} \cdot \mu(\pi_E, M) - \mathbf{w} \cdot \mu(\pi_E, M_Z)| \leq \frac{\eta}{1-\gamma} + \epsilon_H. \quad (18)$$

*Proof.* By the definition of  $M_Z$  and the union bound, we have  $\Pr(\{(s_t, a_t)\}_{t=1}^H \subseteq Z \mid \pi_E, M_Z) = \Pr(\{(s_t, a_t)\}_{t=1}^H \subseteq Z \mid \pi_E, M) \geq 1 - \eta$ . Now suppose  $\mathbf{w} \cdot \mu(\pi_E, M) \geq \mathbf{w} \cdot \mu(\pi_E, M_Z)$ . Then

$$|\mathbf{w} \cdot \mu(\pi_E, M) - \mathbf{w} \cdot \mu(\pi_E, M_Z)| \quad (19)$$

$$= E \left[ \sum_{t=0}^H \gamma^t \mathbf{w} \cdot \phi(s_t) \mid \pi_E, M \right] + E \left[ \sum_{t=H+1}^{\infty} \gamma^t \mathbf{w} \cdot \phi(s_t) \mid \pi_E, M \right] \quad (20)$$

$$- E \left[ \sum_{t=0}^H \gamma^t \mathbf{w} \cdot \phi(s_t) \mid \pi_E, M_Z \right] - E \left[ \sum_{t=H+1}^{\infty} \gamma^t \mathbf{w} \cdot \phi(s_t) \mid \pi_E, M_Z \right] \quad (21)$$

$$\leq \eta \frac{1-\gamma^H}{1-\gamma} + \frac{\gamma^{H+1}}{1-\gamma} \quad (22)$$

$$\leq \frac{\eta}{1-\gamma} + \epsilon_H \quad (23)$$

A parallel argument can be made in case  $\mathbf{w} \cdot \mu(\pi_E, M) \leq \mathbf{w} \cdot \mu(\pi_E, M_Z)$ .  $\square$

Since we will not know  $M_Z$  exactly, we will need to estimate it. The following lemma, due to Abbeel and Ng [5] (Lemma 14), says that if two MDP/R's  $M$  and  $\widehat{M}$  do not differ much, then the value of the same policy in  $M$  and  $\widehat{M}$  is not very different.

**Lemma 5.** Let  $M = (\mathcal{S}, \mathcal{A}, \gamma, \theta, \phi)$  and  $\widehat{M} = (\mathcal{S}, \mathcal{A}, \gamma, \widehat{\theta}, \widehat{\phi})$  be two MDP/R's that differ only in their transition functions. Suppose  $\theta$  and  $\widehat{\theta}$  satisfy

$$\forall s \in \mathcal{S}, a \in \mathcal{A} \quad \|\theta(s, a, \cdot), \widehat{\theta}(s, a, \cdot)\|_1 \leq \epsilon. \quad (24)$$

Then for all  $\psi \in \Psi$  and  $\mathbf{w} \in \mathbb{S}^k$ , we have

$$\left| \mathbf{w} \cdot \mu(\psi, M) - \mathbf{w} \cdot \mu(\psi, \widehat{M}) \right| \leq \frac{2\epsilon}{(1-\gamma)^2}. \quad (25)$$

The following lemma, due to Abbeel and Ng [5] (Lemma 17), bounds the number of trajectories needed from  $\pi_E$  to make  $\theta$  and  $\hat{\theta}$  similar on a subset  $Z \subseteq \mathcal{S} \times \mathcal{A}$  that is  $(\eta, H)$ -visited by  $\pi_E$ .

**Lemma 6.** *Let  $M = (\mathcal{S}, \mathcal{A}, \gamma, \theta, \phi)$ . Let  $Z \subseteq \mathcal{S} \times \mathcal{A}$  be  $(\epsilon, H)$ -visited by  $\pi_E$  in  $M$ . Let  $\hat{\theta}$  be the MLE for  $\theta$  formed by observing  $m$  independent trajectories from  $\pi_E$ . Also, let  $K(s, a)$  denote the actual number of times  $(s, a)$  is visited in the  $m$  trajectories. Then for*

$$\forall (s, a) \in Z, K(s, a) \geq \frac{|\mathcal{S}|^2}{4\epsilon^2} \ln \frac{|\mathcal{S}|^3 |\mathcal{A}|}{\epsilon} \quad (26)$$

$$\forall (s, a) \in Z, \|\theta(s, a, \cdot), \hat{\theta}(s, a, \cdot)\|_1 \leq \epsilon \quad (27)$$

to hold with probability  $1 - \delta$ , it suffices that

$$m \geq \frac{|\mathcal{S}|^3 |\mathcal{A}|}{8\epsilon^3} \ln \frac{|\mathcal{S}|^3 |\mathcal{A}|}{\delta\epsilon} + |\mathcal{S}| |\mathcal{A}| \ln \frac{2|\mathcal{S}| |\mathcal{A}|}{\delta}. \quad (28)$$

### 3.1 Putting it all together

Here is the algorithm:

1. Collect  $m \geq \frac{|\mathcal{S}|^3 |\mathcal{A}|}{8\epsilon^3} \ln \frac{|\mathcal{S}|^3 |\mathcal{A}|}{\delta\epsilon} + |\mathcal{S}| |\mathcal{A}| \ln \frac{2|\mathcal{S}| |\mathcal{A}|}{\delta}$  sample trajectories from the expert.
2. Define the following:
  - (a) Let  $Z$  be the set of all state-action pairs  $(s, a)$  such that  $K(s, a) \geq \frac{|\mathcal{S}|^2}{4\epsilon^2} \ln \frac{|\mathcal{S}|^3 |\mathcal{A}|}{\epsilon}$ .
  - (b) Let  $\hat{\theta}$  be the MLE for  $\theta$ .
  - (c) Let  $M = (\mathcal{S}, \mathcal{A}, \gamma, \theta, \phi)$  and  $\hat{M} = (\mathcal{S}, \mathcal{A}, \gamma, \hat{\theta}, \phi)$ .
3. Submit  $\hat{M}_Z$  and  $\hat{\mu}_E$  to the MWAL algorithm, which returns  $\bar{\psi}$ .

Lemma 3 shows that  $V(\bar{\psi}, M)$  is more than  $V(\bar{\psi}, M_Z)$ . Lemma 5 says that  $V(\bar{\psi}, M_Z)$  is close to  $V(\bar{\psi}, \hat{M}_Z)$ . Since  $\hat{M}_Z$  is the MDP that we gave to the MWAL algorithm, Theorem 2 says that  $V(\bar{\psi}, \hat{M}_Z)$  is more than  $V(\pi_E, \hat{M}_Z)$ . Lemma 5 says that  $V(\pi_E, \hat{M}_Z)$  is close to  $V(\pi_E, M_Z)$ . Lemma 4 says that  $V(\pi_E, M_Z)$  is close to  $V(\pi_E, M)$ .

## References

- [1] P. Abbeel, A. Ng (2004). Apprenticeship Learning via Inverse Reinforcement Learning. *ICML* **21**
- [2] Y. Freund, R. E. Schapire (1996). Game Theory, On-line Prediction and Boosting. *COLT* **9**
- [3] Y. Freund, R. E. Schapire (1999). Adaptive Game Playing Using Multiplicative Weights. *Games and Economic Behavior* **29**, 79–103.
- [4] M. Kearns, S. Singh (2002). Near-Optimal Reinforcement Learning in Polynomial Time. *Machine Learning* **49**, 209–232.
- [5] P. Abbeel, A. Ng (2005). Exploration and Apprenticeship Learning in Reinforcement Learning. *ICML* **22** (Long version; available at <http://www.cs.stanford.edu/~pabbeel/>)
