# Supplementary material
Source: ML conference proceedings conference paper supplement (https://proceedings.neurips.cc/paper_files/paper/2007/hash/ca3ec598002d2e7662e2ef4bdd58278b-Abstract.html)
Supplement: Supplementary file [file ca3ec598002d2e7662e2ef4bdd58278b-Supplemental.zip]

# **“A Game-Theoretic Approach to Apprenticeship Learning”**

**Umar Syed and Robert E. Schapire**  
**Poster ID: T10**

- **Goal:** Perform well in an MDP with an unknown reward function.
- **Previous work:** Perform as well as an observed expert.
- **Our contribution:** Perform as well as an observed expert, and possibly much better.
